# Supplementary material for: The large-scale blast score ratio (LS-BSR) pipeline: a method to rapidly compare genetic content between bacterial genomes
Source: PeerJ journal article supplement (doi:10.7717/peerj.332), 2014-04-01

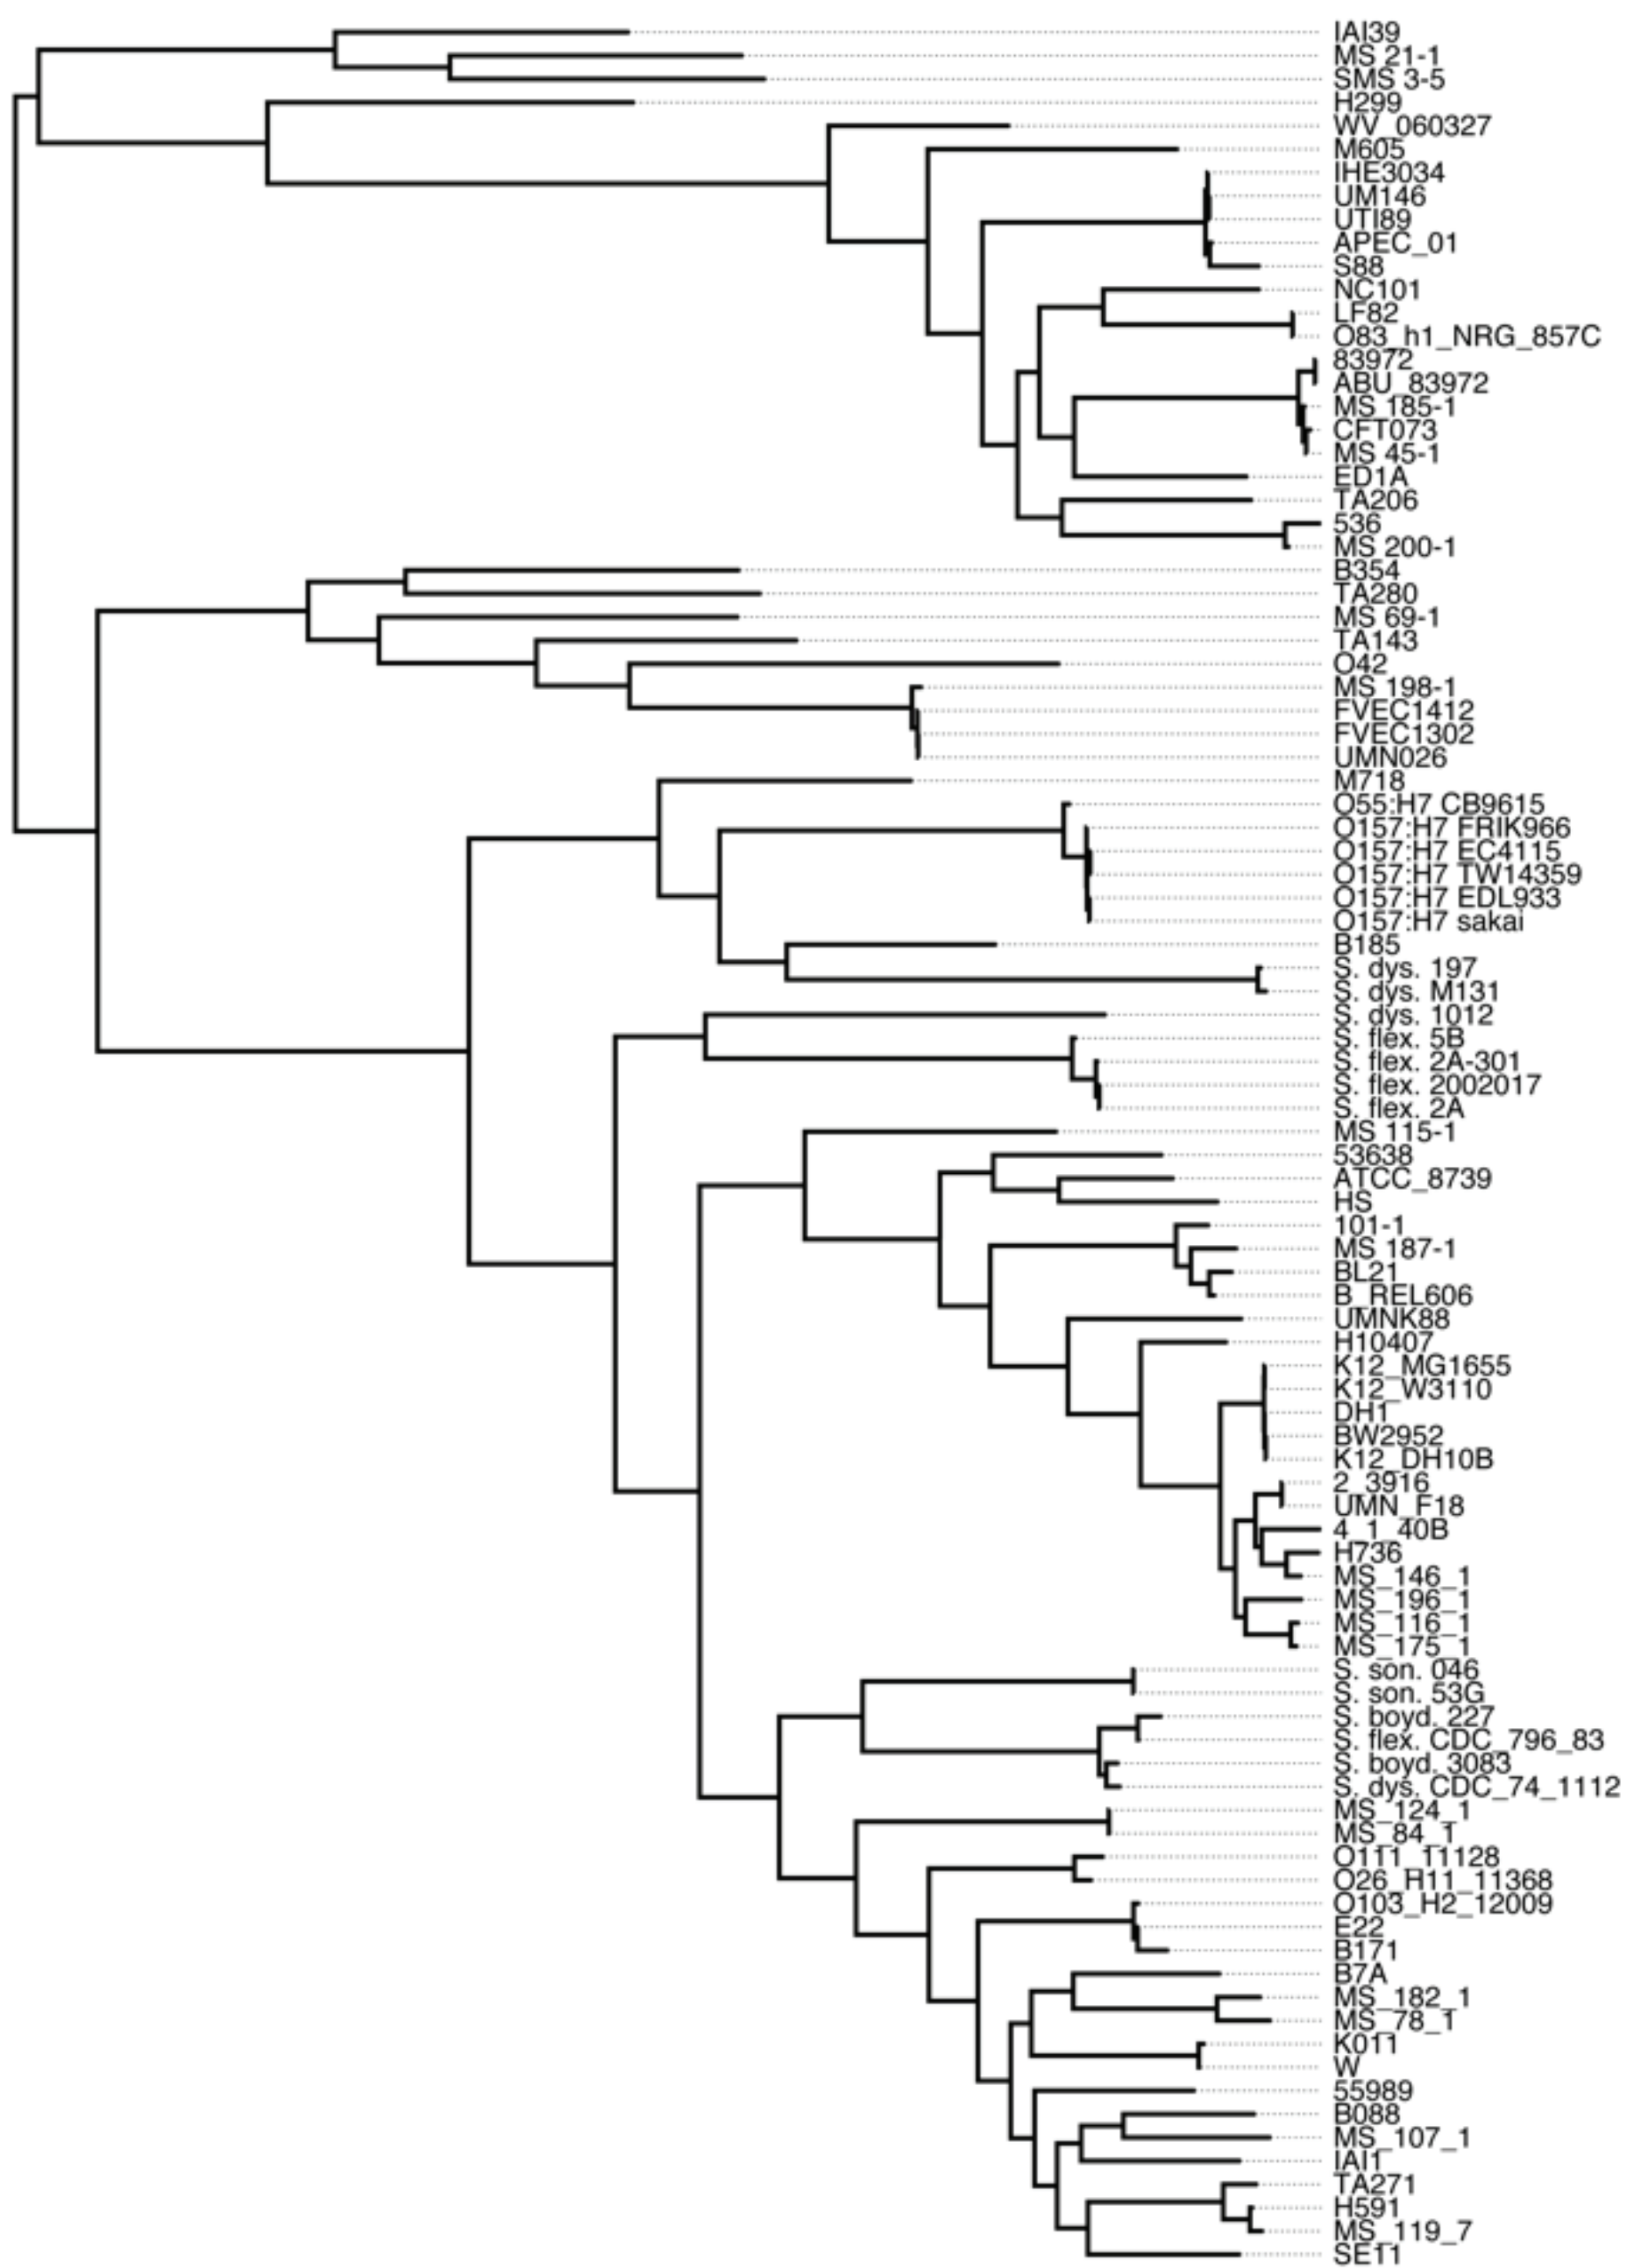

Supplement: Figure_S1.pdf [file Figure_S1.pdf]
