# Supplementary material for: The large-scale blast score ratio (LS-BSR) pipeline: a method to rapidly compare genetic content between bacterial genomes
Source: PeerJ. 2014 Apr 1;2:e332. doi: 10.7717/peerj.332 (PMC3976120; doi:10.7717/peerj.332)
Supplement: Table S3 [file peerj-02-332-s004.xlsx]

## Sheet: Sheet1
Supplemental Table 3. Blast score ratio (BSR) values from a screen of biomarkers
	Pathovar	IpaH3	LT	ST2	bfpB	stx2a	A1	A2	B1	B2	C1	C2	D1	D2	E1	E2	F1	F2	G1	G2	H1	H2	I1	I2	J1	J2	K1	K2	L1	L2	M1	M2	N1	N2	O1	Q1	P1	P2
ECO_IAI39		0.03	0	0	0	0.03	1	1	0	0	0	0	0.11	0	0	0	0	0	0.06	0.02	0.15	0	0.08	0	0.03	0.02	0	0	0	0	0	0	0	0	0	0.16	0.97	0.96
ECO_MS_21_1		0.03	0	0.11	0	0.07	0.98	0.98	0	0	0	0.04	0.11	0	0	0	0	0	0	0.02	0.16	0	0.07	0	0.03	0.02	0	0	0	0	0	0.05	0	0	0	0.16	0.98	0.97
ECO_SMS_3_5		0.03	0	0	0	0.03	0.99	1	0	0	0	0.04	0.12	0	0	0	0	0	0.06	0.02	0.16	0	0.06	0	0	0.02	0	0	0	0	0	0	0	0	0	0.16	0.97	0.97
ECO_H299		0.03	0	0	0	0.06	0	0	0.99	0.98	0	0	0.09	0	0	0	0	0	0.05	0.02	0.16	0	0.07	0	0.03	0.02	0	0	0	0	0	0	0	0	0.03	0.16	0.97	0.97
ECO_WV_060327		0.03	0	0	0	0.08	0	0.34	0.99	1	0	0	0.11	0	0	0	0.07	0	0	0.02	0	0	0	0	0.03	0.02	0	0	0	0	0	0	0	0	0.02	0	1	0.99
ECO_M605		0.03	0	0	0.13	0.03	0	0	0.99	0.99	0	0.04	0.11	0	0	0	0	0	0	0.02	0.16	0	0	0	0	0.02	0	0	0	0	0	0	0.02	0.05	0.02	0.14	0.99	0.98
ECO_IHE3034		0.03	0	0.11	0	0.07	0	0.34	1	0.98	0	0.06	0.11	0	0	0	0	0	0	0.02	0.16	0	0.06	0	0.03	0.02	0	0	0	0	0	0	0	0	0.02	0	0.99	0.99
ECO_UM146		0.03	0	0.11	0	0.07	0	0.34	1	0.98	0	0.06	0.11	0	0	0	0	0	0.05	0.02	0.16	0	0.08	0	0.03	0.02	0	0	0	0	0	0	0	0	0.02	0.14	0.99	0.99
ECO_UTI89		0.03	0	0.11	0	0.07	0	0.34	1	0.98	0	0.06	0.11	0	0	0	0	0	0	0.02	0.16	0	0.08	0	0.03	0.02	0	0	0	0	0	0	0	0	0.02	0.14	0.99	0.99
ECO_APEC_01		0.03	0	0	0	0.07	0	0.34	1	0.98	0	0	0.11	0	0	0	0	0	0.06	0.02	0.16	0	0.07	0	0.03	0.02	0	0	0	0	0	0	0	0	0.02	0.15	0.99	0.99
ECO_S88		0.03	0	0	0	0.07	0	0.34	1	0.98	0	0	0.11	0	0	0	0	0	0.06	0.02	0.16	0	0.07	0	0.03	0.02	0	0	0	0	0	0	0	0	0.02	0.16	0.99	0.99
ECO_NC101		0.03	0	0.11	0	0.03	0	0.34	0.97	0.98	0	0.06	0.11	0	0	0	0	0	0	0.02	0	0	0	0	0	0.02	0	0	0	0	0	0	0.02	0	0.13	0	1	0.98
ECO_LF82		0.03	0	0	0	0.03	0	0.34	0.97	0.98	0	0	0.11	0	0	0	0	0	0	0.02	0	0	0	0	0.03	0.02	0	0	0	0	0	0	0	0	0.02	0	1	1
ECO_O83_h1_NRG_857C		0.03	0	0	0	0.03	0	0.34	0.97	0.98	0	0	0.11	0	0	0	0	0	0	0.02	0	0	0.06	0	0.03	0.02	0	0	0	0	0	0	0	0	0.02	0	1	1
ECO_ABU_83972		0.03	0	0.11	0	0.08	0	0.34	0.97	1	0	0.06	0.11	0	0	0	0	0	0	0.02	0.16	0	0.07	0	0.03	0.02	0	0.09	0	0	0	0	0	0	0.02	0.15	1	1
ECO_83972		0.03	0	0.11	0	0.08	0	0.34	0.97	1	0	0.06	0.11	0	0	0	0	0	0	0.02	0.16	0	0.07	0	0.03	0.02	0	0.09	0	0	0	0	0	0	0.02	0.15	1	1
ECO_MS_185_1		0.03	0	0	0	0.03	0	0.34	0.97	1	0	0	0.11	0	0	0	0	0	0.07	0.02	0.16	0	0.07	0	0.03	0.02	0	0	0	0	0	0	0	0	0.02	0.16	1	1
ECO_CFT073		0.03	0	0.11	0	0.06	0	0.34	0.97	1	0	0.06	0.11	0	0	0	0	0	0.06	0.02	0.16	0	0.07	0	0.03	0.02	0	0	0	0	0	0	0	0	0.02	0.16	1	1
ECO_MS_45_1		0.03	0	0.11	0	0.06	0	0.34	0.97	1	0	0.06	0.11	0	0	0	0	0	0.05	0.02	0.16	0	0.07	0	0.03	0.02	0	0	0	0	0	0	0	0	0.02	0.15	1	1
ECO_ED1A		0.03	0	0	0	0.06	0	0.33	1	0.98	0	0	0.11	0	0	0	0	0	0.06	0.02	0.16	0	0.08	0	0.03	0.02	0	0.09	0	0	0.15	0	0	0	0.02	0.15	0.99	0.98
ECO_TA206		0.03	0	0	0	0.03	0	0.34	0.99	0.98	0	0	0.11	0	0	0	0	0	0	0.02	0	0	0	0	0.03	0.02	0	0	0.02	0	0	0	0	0	0.02	0	1	0.99
ECO_536		0.03	0	0	0	0.03	0	0.34	0.99	1	0	0	0.11	0	0	0	0	0	0.05	0.02	0.16	0	0	0	0.03	0.02	0	0	0	0	0	0	0	0	0.02	0.14	1	0.99
ECO_MS_200_1		0.03	0	0.11	0	0.03	0	0.34	0.99	1	0	0	0.11	0	0	0	0	0	0	0.02	0.16	0	0.07	0	0.03	0.02	0	0	0	0	0	0	0	0	0.02	0.14	1	0.99
ECO_B354		0.03	0	0	0	0.03	0	0	0	0	0	0.04	0.09	0	0	0	0	0	0	0.02	0	0	0	0	0	0.02	0	0	0	0	0	0	0	0	0.02	0	0.97	0.94
ECO_TA280		0.03	0	0	0	0.03	0	0	0	0	0	0	0.08	0	0	0	0	0	0	0.02	0.15	0	0	0	0.03	0.02	0	0	0	0	0.15	0	0	0	0	0	0.97	0.94
ECO_MS_69_1		0.03	0	0	0	0.03	0	0	0	0	0	0	0.09	0	0	0	0	0	0.07	0.02	0.16	0	0.06	0	0	0.02	0	0	0	0	0	0	0	0	0	0.15	0.96	0.94
ECO_TA143		0.03	0	0	0	0.03	0	0	0	0	1	1	0.09	0	0	0	0	0	0	0.02	0	0	0	0	0.03	0.02	0	0	0	0	0	0	0	0	0.02	0	0.96	0.94
ECO_O42		0.03	0	0	0	0.07	0	0	0	0	1	1	0.08	0	0	0	0	0	0.06	0.02	0.16	0	0.08	0	0.03	0.02	0	0	0	0	0	0	0	0	0.02	0.16	0.96	0.95
ECO_MS_198_1		0.03	0	0	0	0.03	0	0	0	0	1	1	0.09	0	0	0	0	0	0.07	0.02	0.16	0	0.07	0	0.03	0.02	0	0	0	0	0	0	0	0	0	0.15	0.97	0.94
ECO_FVEC1412		0.03	0	0	0	0.03	0	0	0	0	1	1	0.09	0	0	0	0	0	0.07	0.02	0	0	0.07	0	0.03	0.02	0	0	0	0	0	0	0	0	0	0.16	0.97	0.94
ECO_FVEC1302		0.03	0	0	0	0.03	0	0	0	0	1	1	0.09	0	0	0	0	0	0.08	0.02	0	0	0.07	0	0.03	0.02	0	0	0	0	0	0	0	0	0	0.17	0.97	0.94
ECO_UMN026		0.03	0	0	0	0.03	0	0	0	0	1	1	0.09	0	0	0	0	0	0.07	0.02	0	0	0.07	0	0.03	0.02	0	0	0	0	0	0	0	0	0	0.16	0.97	0.94
ECO_M718		0.03	0	0	0	0.03	0	0	0	0	0	0.04	1	1	0	0	0	0	0.07	0.02	0.16	0	0.07	0	0.03	0.02	0	0	0	0	0	0.05	0	0	0.11	0.85	0.95	0.94
ECO_O55_H7_CB9615		0.03	0	0	0	0.08	0	0	0	0	0	0.04	1	1	0	0	0.06	0	0	0	0.16	0	0	0	0.03	0.02	0	0.09	0	0	0	0	0	0	0	0.85	0.95	0.94
ECO_O157_H7_FRIK966	STEC	0.03	0	0.11	0	0.95	0	0	0	0	0.04	0.04	0.99	1	0	0	0	0	0.05	0	0.16	0	0.07	0	0.03	0.03	0	0.09	0	0	0	0	0	0	0	0.85	0.95	0.94
ECO_O157_EC4115	STEC	0.03	0	0.11	0	0.98	0	0	0	0	0.04	0.04	0.99	1	0	0	0	0	0	0	0.16	0	0.07	0	0.03	0.02	0	0.08	0	0	0	0	0	0	0	0.83	0.95	0.94
ECO_O157_TW14359	STEC	0.03	0	0.11	0	0.98	0	0	0	0	0.04	0.04	0.99	1	0	0	0	0	0	0	0.16	0	0.07	0	0.03	0.02	0	0.08	0	0	0	0	0	0	0	0.83	0.95	0.94
ECO_O157_EDL933	STEC	0.03	0	0.11	0	0.98	0	0	0	0	0.04	0.04	0.99	1	0	0	0	0	0	0	0.16	0	0.07	0	0.03	0.02	0	0.09	0	0	0	0	0	0	0	1	0.95	0.94
ECO_O157_H7_sakai	STEC	0.03	0	0.11	0	0.98	0	0	0	0	0.04	0.04	0.99	1	0	0	0	0	0	0	0.16	0	0.07	0	0.03	0.02	0	0.08	0	0	0	0	0	0	0	1	0.95	0.94
ECO_B185		0.03	0	0	0	0.03	0.05	0	0	0	0	0.04	0.99	1	0	0	0	0	0.05	0	0	0	0	0	0.05	0.02	0	0	0	0	0	0	0	0	0.11	0.85	0.96	0.95
SDYSENT	Shigella	1	0	0	0	0.19	0	0	0	0	0	0	0.99	0.8	0	0.1	0	0	0	0.02	0	0	0.08	0	0.03	0.02	0	0	0	0	0	0	0	0	0.02	0.84	0.95	0.93
SDYSENT_M131	Shigella	1	0	0	0	0.19	0	0	0	0	0	0	0.99	0.8	0	0.1	0	0	0	0.02	0.15	0	0.08	0	0.03	0.02	0	0	0	0	0	0	0	0	0.02	0.84	0.95	0.93
SDYS1012	Shigella	1	0	0	0	0.06	0	0	0	0	0	0.04	0.09	0	0.98	1	0	0	0	0.02	0.16	0	0.07	0	0.03	0.02	0	0	0	0	0	0	0	0	0	0.84	0	0
SFLEX5B	Shigella	0.65	0	0	0	0.06	0	0	0	0	0	0.03	0.09	0	0.99	1	0	0	0	0.02	0	0	0.07	0	0	0.02	0	0	0	0	0	0	0	0	0.02	0.84	0	0
SFLEX2A_301	Shigella	1	0	0	0	0.06	0	0	0	0	0	0.03	0.09	0	1	1	0	0	0	0.02	0	0	0.07	0	0	0.02	0	0	0	0	0	0	0	0	0.02	0.84	0	0
SFLEX2002017	Shigella	1	0	0	0	0.06	0	0	0	0	0	0.03	0.09	0	1	1	0	0	0	0.02	0	0	0.07	0	0	0.02	0	0	0	0	0	0	0	0	0.02	0.84	0	0
SFLEX2A	Shigella	0.33	0	0	0	0.06	0	0	0	0	0	0.03	0.09	0	1	1	0	0	0	0.02	0	0	0.07	0	0	0.02	0	0	0	0	0	0	0	0	0.02	0.84	0	0
ECO_MS_115_1		0.03	0	0	0	0.03	0	0	0	0	0.04	0.04	0.08	0	0	0	0	0.03	0.07	0.02	0	0	0.07	0	0.03	0.02	0	0	0	0	0	0	0	0	0.02	0.84	0	0
ECO_53638_all	EIEC	1	0	0	0	0.03	0	0	0	0	0	0.04	0.09	0	0	0	0	0	0	0.02	0.16	0	0.07	0	0.03	0.02	0	0	0	0	0	0	0	0	0	0.84	0	0.02
ECO_ATCC_8739		0.03	0	0	0	0.03	0	0	0	0	0	0.04	0.09	0	0	0	0	0	0.07	0.02	0	0	0.07	0	0.03	0.02	0	0	0	0	0	0	0	0	0.02	0.84	0	0
ECO_HS		0.03	0	0	0	0.03	0	0	0	0	0	0	0.08	0	0	0	0	0	0	0.02	0	0	0.07	0	0.12	0.02	0	0	0	0	0	0	0	0	0.02	0.84	0	0
ECO_101_1	EAEC	0.03	0	0	0.29	0.07	0	0	0	0	0	0	0.12	0	0	0	1	1	0.05	0.02	0.16	0	0.07	0	0.03	0.02	0	0	0	0	0	0	0	0	0	0.84	0	0
ECO_MS_187_1		0.03	0	0	0	0.03	0	0	0	0	0	0	0.12	0	0	0	1	1	0.05	0.02	0.16	0	0.07	0	0.03	0.02	0	0	0	0	0	0	0	0	0.02	0.84	0	0
ECO_BL21		0.03	0	0	0	0.03	0	0	0	0	0	0	0.12	0	0	0	1	1	0.07	0.02	0.16	0	0.07	0	0.03	0.02	0	0	0	0	0	0	0	0	0.02	0.84	0	0
ECO_B_REL606		0.03	0	0	0	0.03	0	0	0	0	0	0	0.12	0	0	0	1	1	0	0.02	0.16	0	0.07	0	0.03	0.02	0	0	0	0	0	0	0	0	0.02	0.84	0	0
ECO_UMNK88_all	ETEC	0.03	0.99	0.11	0	0.03	0	0	0	0	0	0.04	0.09	0	0	0	0.07	0	0.07	0.02	0.16	0	0.07	0	0.03	0.02	0	0	0	0	0	0	0	0	0	0.84	0	0
ECO_H10407_no_plasmids	ETEC	0.03	0	0	0	0.08	0	0	0	0	0	0.04	0.09	0	0	0	0.07	0	0	0.02	0	0	0.07	0	0.03	0.02	0	0	0	0	0	0	0	0	0	0.84	0	0.02
ECO_K12_MG1655		0.03	0	0	0	0.03	0	0	0	0	0	0.04	0.09	0	0	0	0	0	1	1	0.16	0	0.07	0	0.03	0.02	0	0	0	0	0	0	0	0	0.02	0.84	0	0.02
ECO_K12_W3110		0.03	0	0	0	0.03	0	0	0	0	0	0.04	0.09	0	0	0	0	0	1	1	0.16	0	0.07	0	0.03	0.02	0	0	0	0	0	0	0	0	0.02	0.84	0	0.02
ECO_DH1		0.03	0	0	0	0.03	0	0	0	0	0	0.04	0.09	0	0	0	0	0	1	1	0.16	0	0.07	0	0.03	0.02	0	0	0	0	0	0	0	0	0.02	0.84	0	0.02
ECO_BW2952		0.03	0	0	0	0.03	0	0	0	0	0	0.04	0.09	0	0	0	0	0	1	1	0.16	0	0.07	0	0.03	0.02	0	0	0	0	0	0	0	0	0.02	0.84	0	0.02
ECO_K12_DH10B		0.03	0	0	0	0.03	0	0	0.08	0	0	0.04	0.09	0	0	0	0	0	1	1	0.16	0	0.07	0	0.03	0.02	0	0	0	0	0	0	0	0	0.02	0.84	0	0.02
ECO_2_3916_ETEC	ETEC	0.03	0	0.46	0	0.81	0	0	0	0	0	0.04	0.09	0	0	0	0	0	0.05	0.02	0	0	0.07	0	0.05	0.02	0	0	0	0	0	0	0	0	0.13	0.84	0	0.02
ECO_UMN_F18	ETEC	0.03	0	0.46	0	0.81	0	0	0	0	0	0.04	0.09	0	0	0	0	0	0	0.02	0	0	0.06	0	0.05	0.02	0	0	0	0	0	0	0	0	0	0.84	0	0.02
ECO_4_1_40B		0.03	0	0	0	0.07	0	0	0	0	0	0.04	0.09	0	0	0	0	0	0.07	0.02	0.16	0	0	0	0.03	0.02	0	0	0	0	0	0	0	0	0.02	0.84	0	0.02
ECO_H736		0.03	0	0	0	0.03	0	0.04	0	0	0	0.04	0.09	0	0	0	0.07	0	0.07	0.02	0.16	0	0.07	0	0	0.02	0	0	0.02	0	0	0	0	0	0.02	0.84	0	0.02
ECO_MS_146_1		0.03	0	0	0	0.03	0	0	0	0	0	0.04	0.09	0	0	0	0	0	0.07	0.02	0.16	0	0.07	0	0.03	0.02	0	0	0.02	0	0	0	0	0	0.02	0.84	0	0.02
ECO_MS_196_1		0.03	0	0	0	0.07	0	0	0	0	0	0.04	0.09	0	0	0	0	0	0.07	0.02	0	0	0.07	0	0.03	0.02	0	0	0	0	0	0	0	0	0	0.77	0.12	0.02
ECO_MS_116_1		0.03	0	0.11	0	0.03	0	0	0	0	0	0.04	0.09	0	0	0	0	0	0.06	0.02	0	0	0.08	0	0.03	0.02	0	0	0	0	0	0	0	0	0.02	0.84	0	0.02
ECO_MS_175_1		0.03	0	0	0	0.03	0	0	0	0	0	0.04	0.09	0	0	0	0.07	0	0.06	0.02	0.16	0	0.07	0	0.03	0.02	0	0	0	0	0	0	0	0	0.11	0.84	0	0.02
SSON046	Shigella	1	0	0	0	0.07	0	0	0	0	0	0.03	0.09	0	0.1	0	0	0	0	0.02	1	1	0.07	0	0.03	0.02	0	0	0	0	0	0	0	0	0.02	0.84	0	0
SSON_53G	Shigella	1	0	0	0	0.05	0	0	0	0	0	0.03	0.09	0	0.1	0	0	0	0	0.02	1	1	0.07	0	0.03	0.02	0	0	0	0	0	0	0	0	0.02	0.84	0	0
SBOYD227	Shigella	1	0	0.11	0	0.07	0	0	0	0	0	0	0.11	0	0	0.11	0	0	0	0.02	0	0	1	0.99	0.03	0.02	0	0	0	0	0	0	0	0	0.02	0.84	0	0
SF_CDC_796_83	Shigella	1	0	0	0	0.07	0	0	0	0	0	0	0.11	0	0	0.11	0	0	0.05	0.03	0	0	0.94	0.99	0.03	0.02	0	0	0	0	0	0	0	0	0.02	0.84	0	0
SBOYD3083	Shigella	1	0	0	0	0.07	0	0	0	0	0	0	0.11	0	0	0	0	0	0	0.03	0.16	0	0.53	0.98	0.03	0.02	0	0.09	0	0	0	0	0	0	0.02	0.83	0	0
SD_CDC_74_1112	Shigella	1	0	0	0	0.07	0	0	0	0	0	0	0.11	0	0	0	0	0	0.05	0.02	0	0	0.94	1	0.03	0.02	0	0.09	0	0	0	0	0	0	0.02	0.84	0	0
ECO_MS_124_1		0.03	0	0	0	0.07	0	0	0	0	0.04	0.04	0.09	0	0	0	0	0	0.05	0.02	0.15	0	0.07	0	1	1	0	0	0	0	0	0	0	0	0	0.85	0	0.02
ECO_MS_84_1		0.03	0	0	0	0.07	0	0	0	0	0.04	0.04	0.09	0	0	0	0	0	0.05	0.02	0.15	0	0.07	0	1	1	0	0	0	0	0	0	0	0	0	0.85	0	0.02
ECO_O111_11128	STEC	0.03	0	0.11	0	0.99	0	0	0	0	0.04	0.04	0.11	0	0	0	0	0	0	0.02	0	0	0.07	0	0	0.02	1	1	0	0	0	0	0	0	0	0.84	0	0
ECO_O26_H11_11368	STEC	0.03	0	0.11	0	0.19	0	0	0	0	0.04	0.04	0.11	0	0	0	0	0	0	0.02	0	0	0.07	0	0.03	0.02	1	1	0	0	0	0	0	0	0	0.84	0	0
ECO_O103_H2_12009	STEC	0.03	0	0	0	0.98	0	0	0	0	0	0.03	0.09	0	0	0	0	0	0	0.02	0.16	0	0.07	0	0.03	0.02	0	0.09	1	1	0	0	0	0	0	0.84	0	0
ECO_E22		0.03	0	0	0	0.08	0	0	0	0	0.04	0.03	0.09	0	0	0	0	0	0.07	0.02	0.16	0	0	0	0.03	0.02	0	0.08	1	1	0	0	0	0	0	0.84	0	0
ECO_B171	EPEC	0.03	0	0	1	0.07	0	0	0	0	0.04	0.03	0.09	0	0	0	0	0	0.05	0.02	0	0	0.07	0	0.03	0.02	0	0	0	0	0	0	0	0	0.11	0.84	0	0
ECO_B7A	ETEC	0.03	0.99	0.99	0	0.07	0	0	0	0	0.04	0.04	0.09	0	0	0	0	0	0.05	0.02	0	0	0.07	0	0.03	0.02	0	0	0	0	0	0	0	0	0	0.84	0	0
ECO_MS_182_1		0.03	0	0.11	0.02	0.03	0	0	0	0	0	0.04	0.09	0	0	0	0	0	0.06	0.02	0.16	0	0.07	0	0.03	0.02	0	0	0	0	1	1	0	0	0	0.84	0	0.02
ECO_MS_78_1		0.03	0	0	0	0.03	0	0	0	0	0	0.04	0.09	0	0	0	0	0	0.07	0.02	0.16	0	0.07	0	0.03	0.02	0	0	0	0	1	1	0	0	0.02	0.84	0	0.02
ECO_K011		0.03	0	0	0	0.03	0	0	0	0	0	0.03	0.09	0	0	0	0	0	0.05	0.02	0	0	0	0	0.05	0.02	0	0	0	0	0	0	1	1	0	0.84	0	0
ECO_W		0.03	0	0	0	0.03	0	0	0	0	0	0.03	0.09	0	0	0	0	0	0.05	0.02	0	0	0	0	0.05	0.02	0	0	0	0	0	0	1	1	0	0.84	0	0
ECO_55989		0.03	0	0	0	0.07	0	0	0	0	0	0.03	0.09	0	0	0	0	0	0	0.02	0.16	0	0.07	0	0.03	0.02	0	0	0	0	0	0	0	0	0	0.84	0	0
ECO_B088		0.03	0.24	0	0	0.03	0	0	0	0	0	0.03	0.09	0	0	0	0	0	0.05	0.02	0	0	0	0	0.05	0.02	0	0	0	0	0	0	0	0	0	0.84	0	0
ECO_MS_107_1		0.03	0	0	0	0.03	0	0	0	0	0	0.03	0.09	0	0	0	0	0	0.07	0.02	0	0	0.07	0	0.03	0.02	0	0	0	0	0	0	0	0	0.12	0.84	0	0.02
ECO_IAI1		0.03	0	0	0	0.03	0	0	0	0	0	0.04	0.09	0	0	0	0	0	0	0.02	0	0	0	0	0.11	0.02	0	0	0	0	0	0	0	0	0.02	0.84	0	0
ECO_TA271		0.03	0	0	0	0.03	0	0	0	0	0	0.04	0.09	0	0	0	0	0	0.05	0.02	0	0	0	0	0.03	0.02	0	0	0	0	0	0	0	0	0	0.84	0	0
ECO_H591		0.03	0	0	0	0.03	0.05	0	0	0	0	0.04	0.09	0	0	0	0	0	0.05	0.02	0.16	0	0.07	0	0	0.02	0	0	0	0	0	0	0	0	1	0.84	0	0
ECO_MS_119_7		0.03	0	0	0	0.03	0	0	0	0	0	0.04	0.09	0	0	0	0	0	0.05	0.02	0.16	0	0.07	0	0	0.02	0	0	0	0	0	0	0	0	1	0.84	0	0
ECO_SE11		0.03	0	0	0	0.03	0.04	0	0	0	0	0.04	0.09	0	0	0	0	0	0.07	0.02	0	0	0.06	0	0.03	0.02	0	0	0	0	0	0	0	0	0.02	0.84	0	0
